# Supplementary material
Source: publisher site journal article supplement (https://www.spandidos-publications.com/4099/downloadSupplementary)

Figure S1. Immunohistochemical expression of Annexin V in HCT116 GFP cells cultured as spheroids for 7 days, then irradiated (6 Gy) at 4-6 h after addition of drug and harvested 24 h later. Spheroids were originally evaluated at x400 magnification. The size of the spheroids varied but mostly ranged 400-500  $\mu\text{m}$ . Scale bar, 200  $\mu\text{m}$ . GFP, green fluorescent protein.

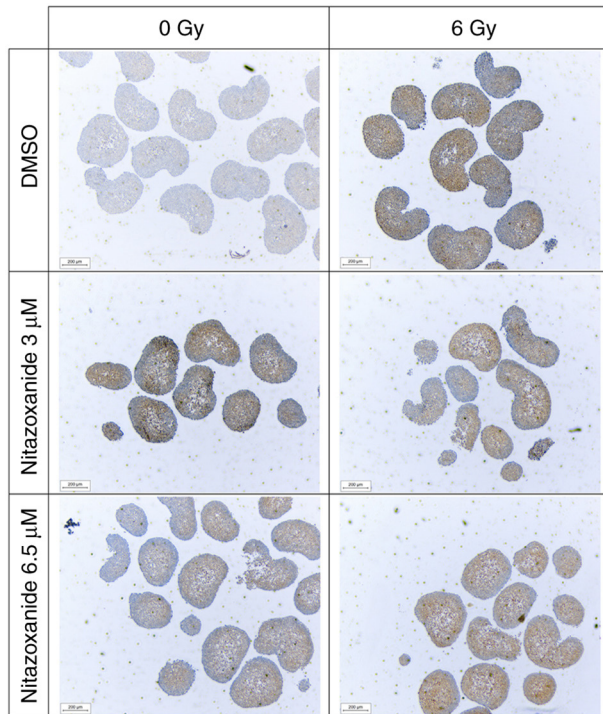

Figure S2. Immunohistochemical expression of caspase-3 in HCT116 GFP cells cultured as spheroids for 7 days, then irradiated (6 Gy) at 4-6 h after addition of drug and harvested 24 h later. Spheroids were originally evaluated at x400 magnification. The size of the spheroids varied but mostly ranged 400-500  $\mu\text{m}$ . Scale bar, 200  $\mu\text{m}$ . GFP, green fluorescent protein.

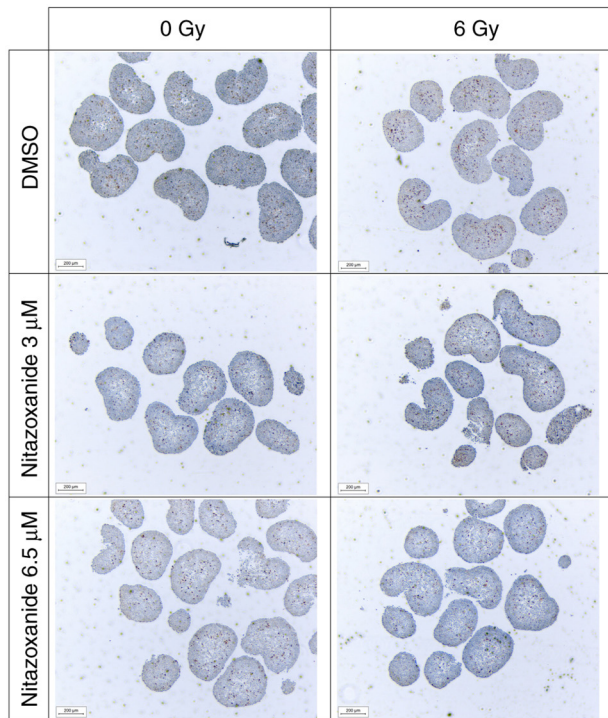

Supplement: Supplementary file 1 [file downloadSupplementary]
